# Supplementary material for: Ectopic Expression of CsCTR1, a Cucumber CTR-Like Gene, Attenuates Constitutive Ethylene Signaling in an Arabidopsis ctr1-1 Mutant and Expression Pattern Analysis of CsCTR1 in Cucumber (Cucumis sativus)
Source: PubMed Central journal article supplement (PMC4200800; doi:10.3390/ijms150916331), 2014-09-15
Supplement: ijms-15-16331-s001.pdf [file ijms-15-16331-s001.pdf]

## Supplementary Information

**Table S1.** Root length of the seedlings grown in the light.

| Seedling Lines | Average of Root Length (mm) | Standard Deviation |
|----------------|-----------------------------|--------------------|
| col            | 11.525 <sup>a</sup>         | 0.127              |
| <i>ctr1-1</i>  | 5.184 <sup>d</sup>          | 0.179              |
| 33             | 7.430 <sup>c</sup>          | 0.073              |
| 15             | 8.174 <sup>bc</sup>         | 0.093              |
| 47             | 8.465 <sup>b</sup>          | 0.046              |

The statistical significance was determined by Duncan's multiple comparison tests. Different letters above bars indicate significant differences ( $p < 0.05$ ). The same letter indicates no significant difference ( $p < 0.05$ ).

**Table S2.** Root and hypocotyl length of the etiolated seedlings.

| Seedling Lines | Average of Root Length (mm) | Standard Deviation | Average of Hypocotyl Length (mm) | Standard Deviation |
|----------------|-----------------------------|--------------------|----------------------------------|--------------------|
| col            | 5.254 <sup>a</sup>          | 1.295              | 14.294 <sup>a</sup>              | 1.704              |
| <i>ctr1-1</i>  | 1.011 <sup>c</sup>          | 0.220              | 7.735 <sup>c</sup>               | 0.629              |
| 33             | 2.641 <sup>b</sup>          | 0.378              | 8.952 <sup>b</sup>               | 0.439              |
| 15             | 2.740 <sup>b</sup>          | 0.600              | 9.216 <sup>b</sup>               | 0.375              |
| 47             | 2.698 <sup>b</sup>          | 0.439              | 9.216 <sup>b</sup>               | 0.493              |

The statistical significance was determined by Duncan's multiple comparison tests. Different letters above bars indicate significant differences ( $p < 0.05$ ). The same letter indicates no significant difference ( $p < 0.05$ ).
